# Supplementary material
Source: MDPI journal article supplement (https://www.mdpi.com/2571-9408/6/3/144)
Supplement: s1 [file s1]

Archive with 1 entries (1 files):
- heritage-2195545-supplementary.pdf
